# Supplementary material for: Vg1-Nodal heterodimers are the endogenous inducers of mesendoderm
Source: eLife. 2017 Nov 15;6:e28183. doi: 10.7554/eLife.28183 (PMC5745085; doi:10.7554/eLife.28183)
Supplement: Figure 2—source data 1. [file elife-28183-fig2-data1.xlsx]

## Sheet: Sheet1
sqt qPCR experiment		TR = technical replicate		BR = biological replicate
									2^CT value
		ef1a TR1 CT values	ef1a TR2 CT values	ef1a avg CT values	lft1 TR1 CT values	lft1 TR2 CT values	lft1 avg CT values	ef1a CT - lft1 CT	BR1
WT	Uninjected	21.6	21.7	21.65	25.49	25.59	25.54	-3.89	0.0674518
Mvg1		24.42	24.47	24.445	32.66	32.27	32.465	-8.02	0.00385247
WT	0.2 pg	21.22	21.2	21.21	23.12	23.11	23.115	-1.905	0.267016
Mvg1		22.96	22.92	22.94	29.09	29.31	29.2	-6.26	0.0130482
WT	2 pg	22.5	22.56	22.53	23.95	23.99	23.97	-1.44	0.368567
Mvg1		24.06	24.12	24.09	27.19	27.25	27.22	-3.13	0.114229
									2^CT value		sqt qPCR experiment
		ef1a TR1 CT values	ef1a TR2 CT values	ef1a avg CT values	lft1 TR1 CT values	lft1 TR2 CT values	lft1 avg CT values	ef1a CT - lft1 CT	BR2		avg	std dev	std error of the mean
WT	Uninjected	24.11	24	24.055	30.27	30.39	30.33	-6.275	0.0129133		0.0401825	0.0385645	0.0272692
Mvg1		21.99	22.1	22.045	28.84	29.29	29.065	-7.02	0.00770494		0.00577871	0.00272411	0.00192624
WT	0.2 pg	23.32	23.22	23.27	26.13	26.23	26.18	-2.91	0.133046		0.200031	0.0947312	0.066985
Mvg1		20.85	20.71	20.78	27.09	27.28	27.185	-6.405	0.0118006		0.0124244	0.000882244	0.000623841
WT	2 pg	23.55	23.43	23.49	24.36	24.41	24.385	-0.895	0.537747		0.453157	0.119628	0.0845899
Mvg1		22.05	22.12	22.085	22.58	22.7	22.64	-0.555	0.680657		0.397443	0.400525	0.283214
cyc qPCR experiment
									2^ CT value
		ef1a TR1 CT values	ef1a TR2 CT values	ef1a avg CT values	lft1 TR1 CT values	lft1 TR2 CT values	lft1 avg CT values	ef1a CT - lft1 CT	BR1
WT	Uninjected	22.95	22.73	22.84	29.22	28.9	29.06	-6.22	0.0134151
Mvg1	Uninjected	21.46	21.5	21.48	32.97	32.68	32.825	-11.345	0.000384428
WT	20pg cyc	21.13	21.18	21.155	25.67	25.82	25.745	-4.59	0.0415214
Mvg1	20pg cyc	23.23	23.25	23.24	30.19	30.36	30.275	-7.035	0.00762525
Mvg1	20pg cyc + 0.5pg vg1	22.77	22.82	22.795	29.21	29.31	29.26	-6.465	0.0113199
Mvg1	20pg cyc + 5pg vg1	22.19	22.27	22.23	26.51	26.53	26.52	-4.29	0.0511189
									2^ CT value		cyc qPCR experiment
		ef1a TR1 CT values	ef1a TR2 CT values	ef1a avg CT values	lft1 TR1 CT values	lft1 TR2 CT values	lft1 avg CT values	ef1a CT - lft1 CT	BR2		avg	std dev	std error of the mean
WT	Uninjected	20.02	20.11	20.065	27.48	27.59	27.535	-7.47	0.00564035		0.00952772	0.00549757	0.00388737
Mvg1	Uninjected	21.14	21.28	21.21	33.3	33.08	33.19	-11.98	0.000247549		0.000315988	9.67881e-05	6.84395e-05
WT	20pg cyc	21.15	21.24	21.195	24.97	25.18	25.075	-3.88	0.0679209		0.0547212	0.0186673	0.0131997
Mvg1	20pg cyc	25.09	25.03	25.06	31.41	31.68	31.545	-6.485	0.011164		0.00939463	0.00250229	0.00176938
Mvg1	20pg cyc + 0.5pg vg1	22.15	22.18	22.165	29.28	29.57	29.425	-7.26	0.00652412		0.00892199	0.0033911	0.00239787
Mvg1	20pg cyc + 5pg vg1	21.79	21.88	21.835	26.4	26.57	26.485	-4.65	0.03983		0.0454744	0.00798243	0.00564443
